# Supplementary material for: Applications of Gabor filter -based features and Gabor filter apart from computed tomography texture analysis
Source: Research Square preprint supplement (doi:10.21203/rs.3.rs-7915666/v1), 2025-11-03
Supplement: Supplementary file 1 [file 756592c83a33ae9e94872ffc.docx]

Table 1. Performance of eleven classifiers for prediction of high-grade and low-grade Fuhrman high nuclear grades for Gabor features groups

| Types of classifiers | TPR | TNR | Percent correct | Recall | Precision | AUROC |
| --- | --- | --- | --- | --- | --- | --- |
| BayesNet | 0.45 | 0.41 | 45.45 | 0.45 | 0.42 | 0.43 |
| NaiveBayes | 0.64 v | 0.63 v | 63.64 v | 0.64 v | 0.64 v | 0.77 v |
| LibSVM | 0.64 v | 0.63 v | 63.64 v | 0.64 v | 0.64 v | 0.63 v |
| Logistic | 0.45 | 0.45 v | 45.45 | 0.45 | 0.45 v | 0.48 v |
| MultilayerPerceptron | 0.45 | 0.48 v | 45.45 | 0.45 | 0.47 v | 0.43 |
| SMO-poly-kernel | 0.73 v | 0.71 v | 72.73 v | 0.73 v | 0.73 v | 0.72 v |
| IBk | 0.73 v | 0.71 v | 72.73 v | 0.73 v | 0.73 v | 0.72 v |
| AdaBoostM1 | 0.45 | 0.41 | 45.45 | 0.45 | 0.42 | 0.45 v |
| Bagging | 0.73 v | 0.74 v | 72.73 v | 0.73 v | 0.74 v | 0.53 v |
| J48 | 0.55 v | 0.52 v | 54.55 v | 0.55 v | 0.54 v | 0.53 v |
| RandomForest | 0.55 v | 0.52 v | 54.55 v | 0.55 v | 0.54 v | 0.67 v |

Abbreviations: TPR, true positive rate; TNR, true negative rate; AUROC, area under receiver operating characteristic curve; GLCM, Gray-level co-occurrence matrix; v, significant better; *, significant worse; AdaBoostM1, Boosting; RandomForest, Random Forest Tree; NaiveBayes, Naive Bayes; J48, Decision Trees; IBk, K- Nearest Neighbors;

BayesNet, Bayesian Network; Multilayer Perceptron, Artificial Neural Networks; Logistic; Logistic Regression; SMO-poly-kernel, Support Vector Machine based on poly-kernel. P< 0.05

Table 2. Performance of eleven classifiers for prediction of high-grade and low-grade Fuhrman nuclear groups for GLCM features groups

| Types of classifiers | TPR | TNR | Percent correct | Recall | Precision | AUROC |
| --- | --- | --- | --- | --- | --- | --- |
| BayesNet | 0.55 | 0.55 | 54.55 | 0.55 | 0.55 | 0.55 |
| NaiveBayes | 0.45 * | 0.45 * | 45.45 * | 0.45 * | 0.45 * | 0.43 * |
| LibSVM | 0.55 | 0.45 * | 54.55 | 0.55 | - | 0.50 * |
| Logistic | 0.64 v | 0.60 v | 63.64 v | 0.64 v | 0.64 v | 0.67 v |
| MultilayerPerceptron | 0.36 * | 0.34 * | 36.36 * | 0.36 * | 0.35 * | 0.30 * |
| SMO-poly-kernel | 0.36 * | 0.34 * | 36.36 * | 0.36 * | 0.35 * | 0.35 * |
| IBk | 0.45 * | 0.48 * | 45.45 * | 0.45 * | 0.47 * | 0.47 * |
| AdaBoostM1 | 0.64 v | 0.60 v | 63.64 v | 0.64 v | 0.64 v | 0.58 v |
| Bagging | 0.36 * | 0.34 * | 36.36 * | 0.36 * | - | 0.47 * |
| J48 | 0.55 | 0.45 * | 54.55 | 0.55 | 0.35 * | 0.50 * |
| RandomForest | 0.55 | 0.52 * | 54.55 | 0.55 | 0.54 * | 0.48 * |

Abbreviations: v, significant better; *, significant worse; -, cannot be computed by WEKA; TPR, true positive rate; TNR, true negative rate; AUROC, area under receiver operating characteristic curve; GLCM, Gray-level co-occurrence matrix; AdaBoostM1, Boosting; RandomForest, Random Forest Tree; NaiveBayes, Naive Bayes; J48, Decision trees; IBk, K- Nearest Neighbors; BayesNet, Bayesian Network; Multilayer Perceptron, Artificial Neural Networks; Logistic; Logistic Regression; SMO-polykernel, Support Vector Machine based on poly-kernel. P< 0.05
